# Supplementary material for: Facile and efficient recovery of lithium from spent LiFePO4 batteries via air oxidation–water leaching at room temperature
Source: Royal Society of Chemistry journal article supplement (doi:10.1039/d1gc03333f), 2021-10-25
Supplement: d1gc03333f1.pdf [file d1gc03333f1.pdf]

## Electronic Supplementary Information

### Facile and efficient recovery of lithium from spent $\text{LiFePO}_4$ batteries via air oxidation leaching at room temperature

Hao Jin<sup>a,b</sup>, Jialiang Zhang<sup>a,b,c,\*</sup>, Duoduo Wang<sup>a,b</sup>, Qiankun Jing<sup>a,b</sup>, Yongqiang

Chen<sup>a,b,c,\*</sup>, Chengyan Wang<sup>a,b,c</sup>

<sup>a</sup> State Key Laboratory of Advanced Metallurgy, University of Science and Technology

Beijing, No. 30 Xueyuan Road, Haidian District, Beijing 100083, China

<sup>b</sup> School of Metallurgical and Ecological Engineering, University of Science and

Technology Beijing, No. 30 Xueyuan Road, Haidian District, Beijing 100083, China

<sup>c</sup> Beijing Key Laboratory of Green Recycling and Extraction of Metals, No. 30

Xueyuan Road, Haidian District, Beijing 100083, China

Corresponding author: Tel.: 861062332271; Fax: 861062333170;

Email: [jialiangzhang@ustb.edu.cn](mailto:jialiangzhang@ustb.edu.cn) (J. Zhang); [chyq0707@sina.com](mailto:chyq0707@sina.com) (Y. Chen)

Number of pages: 14

Number of figures: 5

Number of tables: 10

## 2 Experimental section

### 2.2 Experimental procedure of selective leaching.

#### Details for ICP analysis

**Table S1** The main operating parameters for ICP-OES analysis

| Plasma generation |                 |
|-------------------|-----------------|
| Plasma gas        | Argon (>99.99%) |

|                                               |                                                                       |
|-----------------------------------------------|-----------------------------------------------------------------------|
| RF/MW power (kW)                              | 1.2                                                                   |
| Carrying gas flow (L/min)                     | 1.2                                                                   |
| Cool gas flow (L/min)                         | 13                                                                    |
| Auxiliary gas flow (L/min)                    | 1.0                                                                   |
| Plasma stabilization time (sec)               | 15                                                                    |
| Wavelengths (nm)                              | Li 670.784, Fe 259.940, P 213.618, Al 308.215, Cu 327.396             |
| Matrix                                        | Li: HNO <sub>3</sub> , Fe: HCl, P: H <sub>2</sub> O, Al: HCl, Cu: HCl |
| Concentration of the standard solutions (ppm) | 0, 5, 10, 20                                                          |
| <b>Emission registration</b>                  |                                                                       |
| Replicates                                    | 2                                                                     |
| Replicate read time (sec)                     | 15                                                                    |
| <b>Sample uptake parameters</b>               |                                                                       |
| Sample uptake                                 | Auto                                                                  |
| Sample uptake time (sec)                      | 30                                                                    |
| Feed pump rate (rpm)                          | 20                                                                    |
| Rinse time (sec)                              | 10                                                                    |
| Rinse pump rate (rpm)                         | 20                                                                    |
| Test pump rate (rpm)                          | 20                                                                    |

Nitric and hydrochloric acid were added to prepare the standard solutions to keep an acidity of 1%. Addition, the acidity of samples was adjusted to the same as the standard solutions by nitric or hydrochloric acid to reduce the matrix effect. In order to avoid possible interference from other elements to the measured elements, the spectral lines of the elements have been filtered. A working curve was determined by 4 different concentrations of the standard solutions and the background equivalent concentration was removed. Then the concentration of different element in the solution was measured.

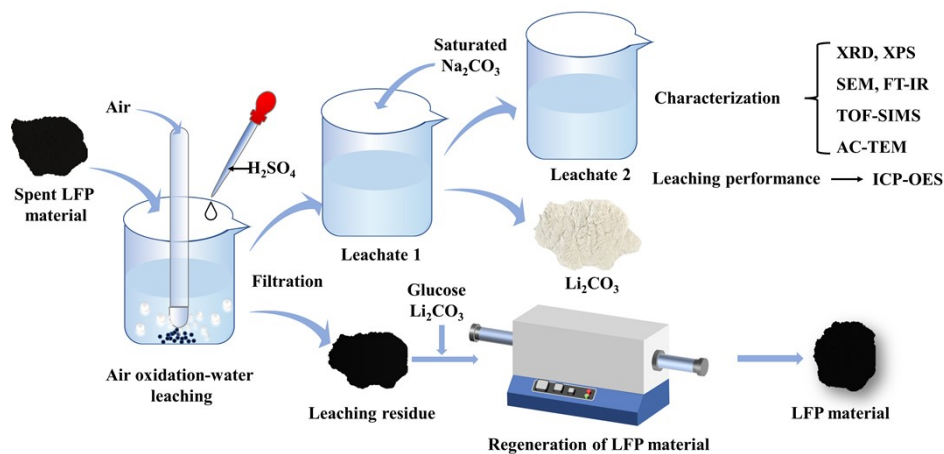

**Figure S1.** The experimental procedure of the air oxidation-water leaching method

### 3 Results and discussion

#### 3.1 Thermodynamic analysis

**Table S2.**  $\Delta_f G_T^\circ$  ( $\text{kJ}\cdot\text{mol}^{-1}$ ) of different species at 25 °C (298.15 K)<sup>[12]</sup>

| Species                   | $\Delta_f G_T^\circ$ ( $\text{kJ}\cdot\text{mol}^{-1}$ ) | Species                                               | $\Delta_f G_T^\circ$ ( $\text{kJ}\cdot\text{mol}^{-1}$ ) |
|---------------------------|----------------------------------------------------------|-------------------------------------------------------|----------------------------------------------------------|
| $\text{Li}^+$             | -293.69                                                  | $\text{PO}_4^{3-}$                                    | -1018.77                                                 |
| $\text{Fe}^{2+}$          | -78.87                                                   | $\text{Li}_3\text{PO}_4$                              | -1965.90                                                 |
| $\text{Fe}^{3+}$          | -4.61                                                    | $\text{FePO}_4\cdot 2\text{H}_2\text{O}$              | -1657.45                                                 |
| $\text{Fe}(\text{OH})_2$  | -492.05                                                  | $\text{Fe}_3(\text{PO}_4)_2\cdot 8\text{H}_2\text{O}$ | -4359.07                                                 |
| $\text{Fe}(\text{OH})_3$  | -705.58                                                  | $\text{LiFePO}_4$                                     | -1480.97                                                 |
| $\text{H}_3\text{PO}_4$   | -1118.92                                                 | $\text{H}_2\text{O}$                                  | -237.14                                                  |
| $\text{H}_2\text{PO}_4^-$ | -1137.15                                                 | $\text{Li}_2\text{SO}_4$                              | -1282.40                                                 |
| $\text{HPO}_4^{2-}$       | -1089.13                                                 |                                                       |                                                          |

**Table S3.** Equilibrium equations relative to the *E*-pH diagram of Li-Fe-P-H<sub>2</sub>O systemat 25 °C (298.15 K)<sup>[12]</sup>

| No. | Reactions                                                                                                                                                                      | <i>E</i> vs pH equations                                                              |
|-----|--------------------------------------------------------------------------------------------------------------------------------------------------------------------------------|---------------------------------------------------------------------------------------|
| 1   | $2\text{H}^+ + 2\text{e} = \text{H}_2$                                                                                                                                         | $E = -0.0592 \text{ pH}$                                                              |
| 2   | $\text{O}_2 + 4\text{e} + 4\text{H}^+ = 2\text{H}_2\text{O}$                                                                                                                   | $E = 1.229 - 0.0592 \text{ pH}$                                                       |
| 3   | $\text{Fe}^{3+} + \text{e} = \text{Fe}^{2+}$                                                                                                                                   | $E = 0.7696 - 0.0592 \lg [\text{Fe}^{2+}]/[\text{Fe}^{3+}]$                           |
| 4   | $\text{FePO}_4 \cdot 2\text{H}_2\text{O} + 3\text{H}^+ = \text{Fe}^{3+} + \text{H}_3\text{PO}_4 + 2\text{H}_2\text{O}$                                                         | $\text{pH} = -3.482 - 1/3 \lg [\text{Fe}^{3+}][\text{H}_3\text{PO}_4]$                |
| 5   | $\text{FePO}_4 \cdot 2\text{H}_2\text{O} + 3\text{H}^+ + \text{e} = \text{Fe}^{2+} + \text{H}_3\text{PO}_4 + 2\text{H}_2\text{O}$                                              | $E = 0.1515 - 0.0592 \lg [\text{Fe}^{2+}][\text{H}_3\text{PO}_4] - 0.1775 \text{ pH}$ |
| 6   | $\text{Fe}_3(\text{PO}_4)_2 \cdot n\text{H}_2\text{O} + 6\text{H}^+ = 3\text{Fe}^{2+} + 2\text{H}_3\text{PO}_4 + n\text{H}_2\text{O}$                                          | $\text{pH} = 0.3654 - 1/3 \lg [\text{H}_3\text{PO}_4] - 1/2 \lg [\text{Fe}^{2+}]$     |
| 7   | $3\text{FePO}_4 \cdot 2\text{H}_2\text{O} + 3\text{e} + 3\text{H}^+ = \text{Fe}_3(\text{PO}_4)_2 \cdot n\text{H}_2\text{O} + \text{H}_3\text{PO}_4 + (6-n) \text{H}_2\text{O}$ | $E = 0.1083 - 0.0197 \lg [\text{H}_3\text{PO}_4] - 0.0592 \text{ pH}$                 |
| 8   | $3\text{LiFePO}_4 + n\text{H}_2\text{O} + 3\text{H}^+ = \text{Fe}_3(\text{PO}_4)_2 \cdot n\text{H}_2\text{O} + 3\text{Li}^+ + \text{H}_3\text{PO}_4$                           | $\text{pH} = 1.1112 - \lg [\text{Li}^+] - 1/3 \lg [\text{H}_3\text{PO}_4]$            |
| 9   | $\text{LiFePO}_4 + 3\text{H}^+ = \text{Fe}^{2+} + \text{Li}^+ + \text{H}_3\text{PO}_4$                                                                                         | $\text{pH} = 0.6137 - 1/3 \lg [\text{Li}^+][\text{Fe}^{2+}][\text{H}_3\text{PO}_4]$   |
| 10  | $\text{FePO}_4 \cdot 2\text{H}_2\text{O} + \text{Li}^+ + \text{e} = \text{LiFePO}_4 + 2\text{H}_2\text{O}$                                                                     | $E = 0.0426 + 0.0592 \lg [\text{Li}^+]$                                               |
| 11  | $\text{Li}_3\text{PO}_4 + \text{Fe}(\text{OH})_3 + 3\text{H}^+ = \text{FePO}_4 \cdot 2\text{H}_2\text{O} + 3\text{Li}^+ + \text{H}_2\text{O}$                                  | $\text{pH} = 6.0831 - \lg [\text{Li}^+]$                                              |

|    |                                                                                                                              |                                                               |
|----|------------------------------------------------------------------------------------------------------------------------------|---------------------------------------------------------------|
| 12 | $\text{Fe(OH)}_3 + \text{Li}_3\text{PO}_4 + 3\text{H}^+ + \text{e} =$ $\text{LiFePO}_4 + 2\text{Li}^+ + 3\text{H}_2\text{O}$ | $E = 1.1224 - 0.1183 \lg [\text{Li}^+] -$ $0.1775 \text{ pH}$ |
| 13 | $\text{Fe(OH)}_2 + \text{Li}_3\text{PO}_4 + 2\text{H}^+ = \text{LiFePO}_4 +$ $2\text{H}_2\text{O} + 2\text{Li}^+$            | $\text{pH} = 7.4167 - \lg [\text{Li}^+]$                      |
| 14 | $\text{Fe(OH)}_3 + \text{H}^+ + \text{e} = \text{Fe(OH)}_2 + \text{H}_2\text{O}$                                             | $E = 0.2447 - 0.0592 \text{ pH}$                              |

**Table S4.** Standard electrode potential for some electrical couples in the aqueous solution

| Electrode reaction                                                       | $E^0/\text{V}$         |
|--------------------------------------------------------------------------|------------------------|
| $\text{S}_2\text{O}_8^{2-} + 2\text{e} = 2\text{SO}_4^{2-}$              | $E^0 = 2.010\text{V}$  |
| $\text{H}_2\text{O}_2 + 2\text{H}^+ = 2\text{H}_2\text{O}$               | $E^0 = 1.770\text{V}$  |
| $\text{Fe}^{3+} + \text{e} = \text{Fe}^{2+}$                             | $E^0 = 0.7696\text{V}$ |
| $\text{O}_3 + 2\text{H}^+ + 2\text{e} = \text{O}_2 + \text{H}_2\text{O}$ | $E^0 = 2.07\text{V}$   |
| $\text{O}_2 + 4\text{H}^+ + 4\text{e} = 2\text{H}_2\text{O}$             | $E^0 = 1.229\text{V}$  |
| $\text{O}_2(\text{air}) + 4\text{H}^+ + 4\text{e} = 2\text{H}_2\text{O}$ | $E^0 = 1.218\text{V}$  |

where  $E^0$  is the standard electrode potentials of the corresponding half-reactions for these oxidants at 298.15 K.

### 3.2 Leaching behavior in the air oxidation water leaching process

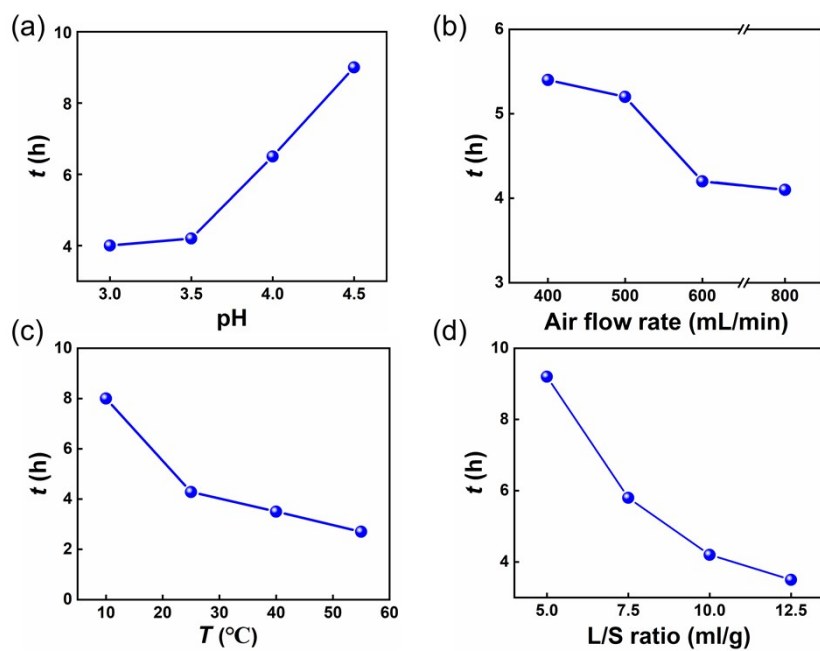

**Fig. S2** the required  $t$  of 95% dilithiated from spent LFP under different conditions.

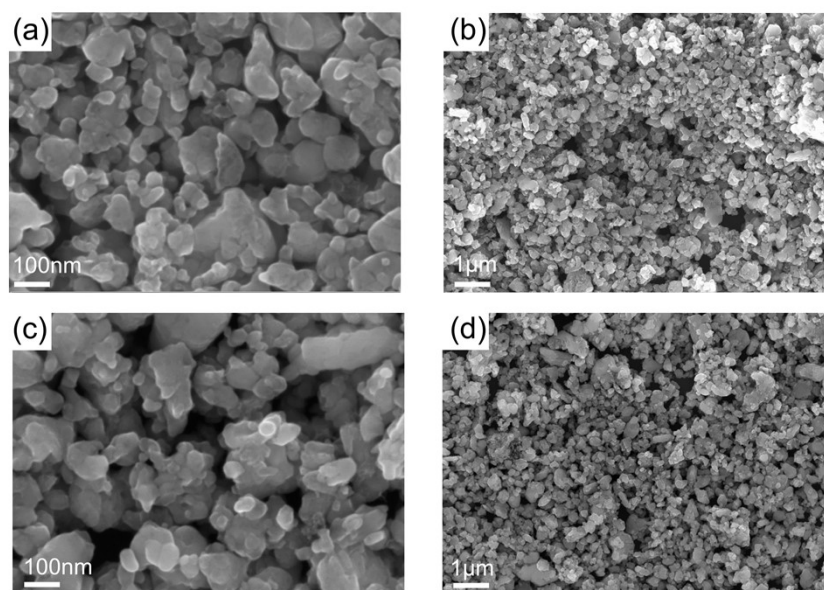

**Fig. S3.** SEM images of the (a, b) spent LFP cathode material, (c, d) leaching residue under different enlargement factors.

### 3.3 Lithium leaching kinetics

**Table S5.** Parameters of the Avrami model for air oxidation-water leaching of Li at different pH value

| pH  | $n$     | $k$ (h <sup>-1</sup> ) | $R^2$  |
|-----|---------|------------------------|--------|
| 3.0 | 1.09544 | 0.6107                 | 0.9933 |
| 3.5 | 1.02133 | 0.4232                 | 0.9854 |
| 4.0 | 0.95623 | 0.2922                 | 0.9920 |
| 4.5 | 0.89211 | 0.3054                 | 0.9918 |

**Table S6.** Parameters of the Avrami model for air oxidation-water leaching of Li at different air flow rate

| Air flow rate (ml/min) | $n$     | $k$ (h <sup>-1</sup> ) | $R^2$  |
|------------------------|---------|------------------------|--------|
| 400                    | 0.9927  | 0.3215                 | 0.992  |
| 500                    | 1.04797 | 0.3476                 | 0.9876 |
| 600                    | 0.91531 | 0.4232                 | 0.9938 |
| 800                    | 0.86922 | 0.4712                 | 0.9921 |

**Table S7.** Parameters of the Avrami model for air oxidation-water leaching of Li at different L/S ratio

| L/S (mL/g) | $n$     | $k$ (h <sup>-1</sup> ) | $R^2$  |
|------------|---------|------------------------|--------|
| 5          | 0.83536 | 0.2411                 | 0.9922 |
| 7.5        | 0.88572 | 0.3195                 | 0.9805 |
| 10         | 0.9151  | 0.4263                 | 0.9919 |
| 12.5       | 1.10317 | 0.6882                 | 0.9917 |

**Table S8.** Parameters of the Avrami model for air oxidation-water leaching of Li at different temperatures

| Temperature (°C) | $n$ | $k$ (h <sup>-1</sup> ) | $R^2$ |
|------------------|-----|------------------------|-------|
|------------------|-----|------------------------|-------|

|    |         |        |        |
|----|---------|--------|--------|
| 10 | 1.04462 | 0.2946 | 0.9857 |
| 25 | 1.02133 | 0.4232 | 0.9935 |
| 40 | 1.11489 | 0.5756 | 0.9900 |
| 55 | 1.15709 | 0.7643 | 0.9900 |

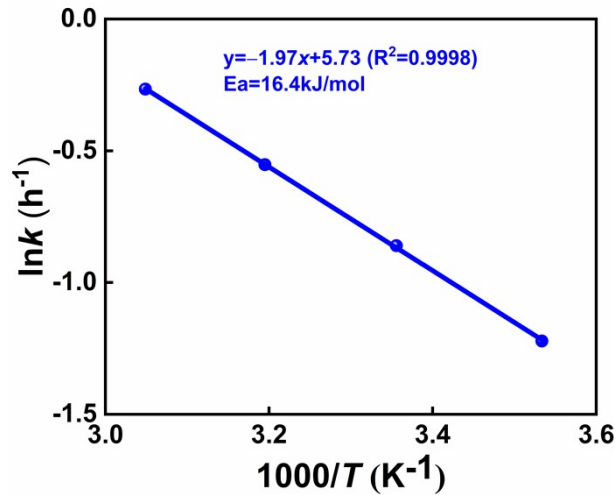

Figure S4. Arrhenius plot for the air oxidation leaching of Li from 10 °C to 55 °C

### 3.5 Regeneration of LFP cathode material

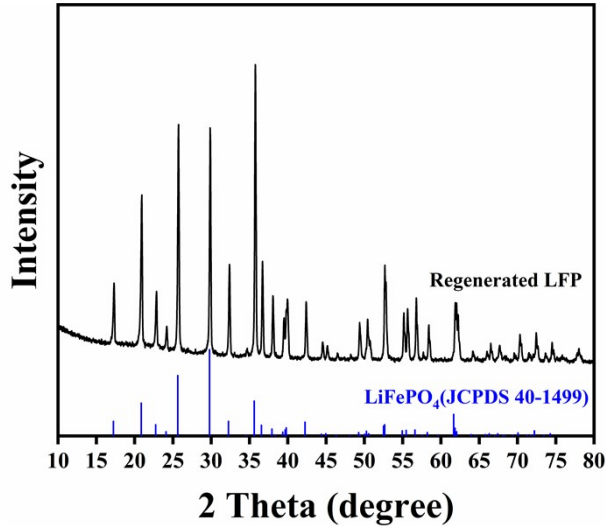

Fig. S5 XRD pattern of the regenerated LFP material

### 3.6 Preliminary analysis of the proposed technology

A preliminary economic analysis was carried out to evaluate the benefits of recycling 1 ton spent LFP cathode powders. The spent cathode material contains 4.47% of Li by weight and the recovery rate of Li is 98%. Procedures mainly included



leaching, filtering, drying, evaporative crystallization and freeze crystallization. The price of various products, reagents and the expenditure, including energy, water, labor, equipment depreciation and maintenance were from the latest data of the Internet and some available literatures<sup>8,11</sup>. The average wage per labor is \$14366.7 per year in China and assumed the working day is 300 days and 8 h of the working time. The results of the calculation are shown in **table S9**.

Revenue: The products in this process are  $\text{Li}_2\text{CO}_3$ ,  $\text{FePO}_4$ ,  $\text{Na}_2\text{SO}_4 \cdot 10\text{H}_2\text{O}$ , the price is 13.83<sup>1</sup>, 0.84<sup>2</sup>, 0.05<sup>3</sup>  $\text{\$} \cdot \text{kg}^{-1}$ , respectively. The total revenue from 1 ton spent LFP cathode powders is calculated as the following formula:

$$R = P_i \times m_i = \$13.8 \times 233.6 + \$0.84 \times 960 + \$0.05 \times 1022.70 = \$4081.2$$

where  $R$ ,  $P_i$  and  $m_i$  represent revenue, price of the product of  $i$  and mass of product of  $i$ .

Costs of reagents: The dosage of  $\text{H}_2\text{SO}_4$ ,  $\text{Na}_2\text{CO}_3$ , are 322.05 and 358.44 kg, and the price is 0.215 and 0.3  $\text{\$} \cdot \text{kg}^{-1}$ . The total cost of reagents is calculated as followed:

$$C_r = p_i \times m_i = \$0.125 \times 322.1 + \$0.19 \times 358.4 = \$108.4$$

$C_r$ ,  $p_i$  and  $m_i$  are the cost of reagents, price of reagent  $i$  and mass of reagent  $i$ .

The costs of electricity and water: The total energy consumption of all procedures is 1706 kWh. Water consumption of all procedures is 7 tons. The prices are 0.19  $\text{\$} \cdot \text{kWh}^{-1}$  and 0.91  $\text{\$} \cdot \text{ton}^{-1}$ :

$$C = C_E + C_W = p_e \times E_p + p_w \times m_w = \$0.19 \times 1706 + \$0.91 \times 7 = \$330.5$$

where  $C_W$  represents the cost of water consumption,  $C_E$  represents the cost of the total consumption of the whole procedure.  $p_e$   $p_w$   $E_p$   $m_w$  are the price of energy, price of water, energy consumption of all procedures and mass of water, respectively.

The cost of labor: The actual industrial production can recycle 10 tons of spent cathode powders per day. So, the cost of labor to recycle 1 ton cathode powders can be calculated as followed:

$$C_l = n \times W_l / 10 = 24 \times 47.89 \div 10 = \$114.9$$

where  $C_l$  represents the cost of labor;  $n$  represents the number of workers;  $W_l$  represents the wage per labor.

**Table S9** Economic analysis for recycling 1 ton of spent LFP cathode material by the proposed method in China (exchange rate: 1 \$ = 6.4 CNY)

|                |                                                     |                              |          |             |
|----------------|-----------------------------------------------------|------------------------------|----------|-------------|
| <b>Revenue</b> | Product benefits                                    |                              |          |             |
|                | Products                                            | Price (\$·kg <sup>-1</sup> ) | Mass(kg) | Profit (\$) |
|                | Li <sub>2</sub> CO <sub>3</sub>                     | 13.8 <sup>1</sup>            | 233.6    | 3223.7      |
|                | FePO <sub>4</sub>                                   | 0.84 <sup>2</sup>            | 960.0    | 806.4       |
|                | Na <sub>2</sub> SO <sub>4</sub> ·10H <sub>2</sub> O | 0.05 <sup>3</sup>            | 1022.7   | 51.1        |
|                | Total                                               |                              |          | 4081.2      |
| <b>Cost</b>    | Reagents Cost                                       |                              |          |             |
|                | Reagent                                             | Price (\$·kg <sup>-1</sup> ) | Mass(kg) | Cost (\$)   |
|                | Spent LFP cathode material                          |                              | 1000     | 1406.3      |

|                           |                                 |                         |                               |                     |
|---------------------------|---------------------------------|-------------------------|-------------------------------|---------------------|
|                           | H <sub>2</sub> SO <sub>4</sub>  | 0.125 <sup>4</sup>      | 322.1                         | -40.3               |
|                           | Na <sub>2</sub> CO <sub>3</sub> | 0.19 <sup>5</sup>       | 358.4                         | -68.1               |
| <b>Cost</b>               | Energy Cost                     |                         |                               |                     |
|                           | Procedure                       | Energy consumption(kWh) | Price (\$·kWh <sup>-1</sup> ) | Cost (\$)           |
|                           | Leaching                        | 200                     | 0.19 <sup>8</sup>             | -38                 |
|                           | Filtering, drying               | 230                     | 0.19                          | -43.7               |
|                           | Evaporative crystallization     | 1100                    | 0.19                          | -209                |
|                           | Freeze crystallization          | 176                     | 0.19                          | -33.4               |
|                           | Other Cost                      |                         |                               | Cost (\$)           |
|                           | Water                           | Consumption(ton)        | Price (\$·ton <sup>-1</sup> ) |                     |
|                           |                                 | 7                       | 0.91 <sup>6</sup>             | -6.4                |
|                           | Labor                           |                         |                               | -114.9 <sup>7</sup> |
| Depreciation of equipment |                                 |                         | -76 <sup>8</sup>              |                     |
| Maintenance of equipment  |                                 |                         | -15 <sup>11</sup>             |                     |
| <b>Profits (\$)</b>       |                                 |                         |                               | 2030.1              |

**Table S10.** Summary of different processes for the selective extraction of Li from LFP material

| Cathode material | Methods | Acid | Oxidant | Recovery efficiency | Ref. |
|------------------|---------|------|---------|---------------------|------|
|                  |         |      |         |                     |      |

|                     |                             |                                |                                                                                |          |           |
|---------------------|-----------------------------|--------------------------------|--------------------------------------------------------------------------------|----------|-----------|
| LiFePO <sub>4</sub> | Direct oxidation            |                                | Fe <sub>2</sub> (SO <sub>4</sub> ) <sub>3</sub> +H <sub>2</sub> O <sub>2</sub> | 96.5% Li | [9]       |
| LiFePO <sub>4</sub> | Direct oxidation            |                                | Na <sub>2</sub> S <sub>2</sub> O <sub>8</sub>                                  | 99% Li   | [8]       |
| LiFePO <sub>4</sub> | Direct oxidation            | H <sub>2</sub> SO <sub>4</sub> | H <sub>2</sub> O <sub>2</sub>                                                  | 96.9% Li | [10]      |
| LiFePO <sub>4</sub> | Direct oxidation            | CH <sub>3</sub> COOH           | H <sub>2</sub> O <sub>2</sub>                                                  | 95.1% Li | [11]      |
| LiFePO <sub>4</sub> | Direct oxidation            | H <sub>2</sub> SO <sub>4</sub> | H <sub>2</sub> O <sub>2</sub>                                                  | 94.9% Li | [12]      |
| LiFePO <sub>4</sub> | Direct oxidation            | Citric acid                    | H <sub>2</sub> O <sub>2</sub>                                                  | 94.9% Li | [13]      |
| LiFePO <sub>4</sub> | High-temperature conversion | H <sub>2</sub> SO <sub>4</sub> |                                                                                | 98.5% Li | [14]      |
| LiFePO <sub>4</sub> | Mechanochemical activation  |                                |                                                                                | 96.3% Li | [15]      |
| LiFePO <sub>4</sub> | Mechanochemical activation  |                                | Na <sub>2</sub> S <sub>2</sub> O <sub>8</sub>                                  | 99.7% Li | [16]      |
| LiFePO <sub>4</sub> | Electrolysis                |                                | K <sub>3</sub> Fe (CN) <sub>6</sub>                                            | 99.8% Li | [17]      |
| LiFePO <sub>4</sub> | Electrolysis                |                                |                                                                                | 98% Li   | [18]      |
| LiFePO <sub>4</sub> | Electrolysis                |                                |                                                                                | 95.2% Li | [19]      |
| LiFePO <sub>4</sub> | Direct oxidation            | H <sub>2</sub> SO <sub>4</sub> | Air                                                                            | 99.3% Li | This work |

## Reference

[1] <https://www.100ppi.com/lithium-prices-update>, (accessed May 23, 2021).

[2] <https://www.alibaba.com/product-detail/tech-grade-battery-gradeFerric-phosphate->

Iron\_60697530919.html?spm=a2700.7724838.2017115.71.207064e4AnF8mi,  
(accessed May 23, 2021).

- [3] [https://www.alibaba.com/product-detail/sodium-sulphate-decahydrate\\_60751755004.html?spm=a2700.7724838.2017115.10.7b0d63bePQw1YU&s=p](https://www.alibaba.com/product-detail/sodium-sulphate-decahydrate_60751755004.html?spm=a2700.7724838.2017115.10.7b0d63bePQw1YU&s=p), (accessed May 23, 2021).
- [4] <https://www.100ppi.com/sulfuric-acid-prices-update>, (accessed May 23, 2021).
- [5] <https://www.100ppi.com/soda-ash-light-99.html>, (accessed May 23, 2021)
- [6] <https://www.ceicdata.com/en/china/water-price>, (accessed May 23, 2021).
- [7] <https://tradingeconomics.com/china/wages>, (accessed May 23, 2021).
- [8] J. Zhang, J. Hu, Y. Liu, Q. Jing, C. Yang, Y. Chen and C. Wang, *ACS Sustainable Chemistry & Engineering*, 2019, **7**, 5626-5631.
- [9] Y. Dai, Z. Xu, D. Hua, H. Gu and N. Wang, *Journal of Hazardous Materials*, 2020, **396**, 122707.
- [10] H. Li, S. Xing, Y. Liu, F. Li, H. Guo and G. Kuang, *ACS Sustainable Chemistry & Engineering*, 2017, **5**, 8017-8024.
- [11] Y. Yang, X. Meng, H. Cao, X. Lin, C. Liu, Y. Sun, Y. Zhang and Z. Sun, *Green Chemistry*, 2018, **20**, 3121-3133.
- [12] Q. Jing, J. Zhang, Y. Liu, C. Yang, B. Ma, Y. Chen and C. Wang, *Journal of Physical Chemistry C*, 2019, **123**, 14207-14215.
- [13] J. Kumar, X. Shen, B. Li, H. Liu and J. Zhao, *Waste Management*, 2020, **113**, 32-40.
- [14] S. Tao, J. Li, L. Wang, L. Hu and H. Zhou, *Ionics*, 2019, **25**, 5643-5653.

- [15]K. Liu, Q. Tan, L. Liu and J. Li, *Environmental Science & Technology*, 2019, **53**, 9781-9788.
- [16]K. Liu, L. Liu, Q. Tan and J. Li, *Green Chemistry*, 2021, **23**, 1344-1352.
- [17]J. Yu, X. Wang, M. Zhou and Q. Wang, *Energy & Environmental Science*, 2019, **12**, 2672-2677.
- [18]Z. Li, D. Liu, J. Xiong, L. He, Z. Zhao and D. Wang, *Waste Management*, 2020, **107**, 1-8.
- [19]B. Zhang, X. Qu, J. Qu, X. Chen, H. Xie, P. Xing, D. Wang and H. Yin, *Green Chemistry*, 2020, **22**, 8633-8641.
